# Supplementary material for: Randomized Study of Apatinib plus Ifosfamide and Etoposide versus Ifosfamide and Etoposide in Patients With Advanced Osteosarcomas (OAIE/PKUPH-sarcoma 11)
Source: Research Square preprint supplement (doi:10.21203/rs.3.rs-5641573/v1), 2025-01-16
Supplement: Supplementary file 1 [file 65a56098815e8132c64dfec1.docx]

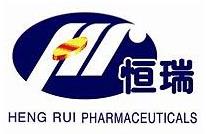


STATISTICAL ANALYSIS PLAN
(SAP)

**Efficacy and safety of Apatinib plus ifosfamide and etoposide (IE) versus IE chemotherapy alone after progression to first-line in relapsed or refractory osteosarcoma: a multicenter, randomized, prospective study**

**MA-STS-010**

**Version 1.0 22 DEC 2023**

**CONFIDENTIALITY STATEMENT**

The information is provided to you in confidence to enable you to perform the work. Do not give this document or any copy of it or reveal any proprietary information contained in it to any third party or person without the prior permission of an authorization.

Approval Form

| **Prepared By:** | | | | | | |
| --- | --- | --- | --- | --- | --- | --- |
|  | Xinyu He |  |  |  | 2023/12/22 |  |
|  | **Print Name/Role** |  | **Signature** |  | **Date** |  |
|  |  |  |  |  |  |  |
| **Approved By:** | | | | | | |
|  |  |  |  |  |  |  |
|  | **Print Name/Role** |  | **Signature** |  | **Date** |  |
|  |  |  |  |  |  |  |
|  |  |  |  |  |  |  |
|  | **Print Name** |  | **Signature** |  | **Date** |  |
|  |  |  |  |  |  |  |

| DOCUMENT REVISION HISTORY | | |
| --- | --- | --- |
| Document Version | Document Date | Reason for Revision |
| 1.0 | 22 DEC 2023 | First version – Not applicable |
|  |  |  |
|  |  |  |

Table of Contents

[Approval Form 2](#_Toc163742363)

[LIST OF ABBREVIATIONS AND DEFINITIONS OF TERMS 7](#_Toc163742364)

[1. Introduction 9](#_Toc163742365)

[2. STUDY OBJECTIVES 10](#_Toc163742366)

[2.1. Primary Objectives 10](#_Toc163742367)

[2.2. Secondary Objectives 10](#_Toc163742368)

[3. STUDY DESIGN and methods 11](#_Toc163742369)

[3.1. General Study Design and Plan 11](#_Toc163742370)

[3.2. Randomization 11](#_Toc163742371)

[3.3. Blinding 11](#_Toc163742372)

[3.4. Schedule of Events 11](#_Toc163742373)

[4. STUDY ENDPOINTS 12](#_Toc163742374)

[4.1. Efficacy Endpoint(s) 12](#_Toc163742375)

[4.1.1. Primary Efficacy Endpoint(s) 12](#_Toc163742376)

[4.1.2. Secondary Efficacy Endpoint(s) 12](#_Toc163742377)

[4.2. Safety Endpoint(s) 12](#_Toc163742378)

[4.3. Exploratory Endpoint(s) 12](#_Toc163742379)

[5. SAMPLE SIZE DETERMINATION 13](#_Toc163742380)

[6. INTERIM Analysis 14](#_Toc163742381)

[7. GENERAL AND STATISTICAL CONSIDERATIONS 15](#_Toc163742382)

[7.1. Analysis Sets 15](#_Toc163742383)

[7.1.1. Full Analysis Set 15](#_Toc163742384)

[7.1.2. Safety Analysis Set 15](#_Toc163742385)

[7.1.3. Per-Protocol Analysis Set 15](#_Toc163742386)

[7.2. General Considerations 15](#_Toc163742387)

[7.2.1. Reference Start Date, End Date and Study Day 15](#_Toc163742388)

[7.2.2. Baseline 15](#_Toc163742389)

[7.2.3. Definition and Use of Visit Windows 15](#_Toc163742390)

[7.2.4. Repeated or Unscheduled Assessments of Safety Parameters 16](#_Toc163742391)

[7.3. Statistical Considerations 16](#_Toc163742392)

[7.3.1. Missing Date or Incomplete Date 16](#_Toc163742393)

[7.3.1.1. Missing or Incomplete Date Information of Study Treatment 16](#_Toc163742394)

[7.3.1.2. Incomplete Date Information for Prior and Concomitant Medications 16](#_Toc163742395)

[7.3.1.3. Incomplete Date Information for Adverse Events 17](#_Toc163742396)

[7.3.1.4. Incomplete death date 17](#_Toc163742397)

[7.3.1.5. Incomplete PD date 17](#_Toc163742398)

[7.3.2. Character Values of Clinical Laboratory Tests 18](#_Toc163742399)

[7.3.3. Computing Methods and Reporting Conventions 18](#_Toc163742400)

[7.3.3.1. Statistical Summary Conventions 18](#_Toc163742401)

[7.3.3.2. General Reporting Conventions 18](#_Toc163742402)

[7.3.4. Subgroups 18](#_Toc163742403)

[8. STATISTICAL ANALYSIS 20](#_Toc163742404)

[8.1. Summary of Study Data 20](#_Toc163742405)

[8.1.1. Subject Disposition 20](#_Toc163742406)

[8.1.2. Protocol Deviations 20](#_Toc163742407)

[8.1.3. Demographic and Baseline Characteristics 20](#_Toc163742408)

[8.1.4. Tumor Diagnosis and treatment history 20](#_Toc163742409)

[8.2. Efficacy Analyses 21](#_Toc163742410)

[8.2.1. Analysis of Primary Efficacy Endpoints 21](#_Toc163742411)

[8.2.1.1. Main analysis of the primary efficacy endpoint 22](#_Toc163742412)

[8.2.1.2. Sensitivity analysis of the primary efficacy endpoint 22](#_Toc163742413)

[8.2.1.3. Subgroup analysis 22](#_Toc163742414)

[8.2.2. An odds ratio (OR) forest plot will be created, and no type I error control will be conducted for subgroup analysis Analysis of Secondary Efficacy Endpoints 22](#_Toc163742415)

[8.2.2.1. Overall survival 22](#_Toc163742416)

[8.2.2.2. Objective response rate (ORR) and Disease control rate (DCR) 23](#_Toc163742417)

[8.2.2.3. Duration of Response (DoR), Time to progress (TTP) and Time to Response (TTR) 23](#_Toc163742418)

[8.3. Safety Analyses 24](#_Toc163742419)

[8.3.1. Adverse Events 24](#_Toc163742420)

[8.3.1.1. Treatment-related TEAEs 25](#_Toc163742421)

[8.3.1.2. Serious adverse events 26](#_Toc163742422)

[8.3.1.3. TEAE leading to study drug interruption, dose reduction and discontinuation 26](#_Toc163742423)

[8.3.1.4. Death, Other Serious Adverse Events, and Other Significant Adverse Events 26](#_Toc163742424)

[8.4. Patients Reported Outcome (PRO) Analysis 26](#_Toc163742425)

[9. Summary of Changes to the Statistical Analyses Specified in Protocol 28](#_Toc163742426)

[10. REFERENCES 29](#_Toc163742427)

[11. APPENDICES 30](#_Toc163742428)

LIST OF ABBREVIATIONS AND DEFINITIONS OF TERMS

| ABBREVIATION | DEFINITION |
| --- | --- |
| AE | Adverse event |
| BMI | Body mass index |
| BSA | Body Surface Area |
| BOR | Best overall response |
| CR | Complete response |
| CI | Confidence Interval |
| DCR | Disease control rate |
| DoR | Duration of response |
| eCRF | Electronic case report form |
| ECOG | Eastern cooperative oncology group |
| ECG | Electrocardiogram |
| ECHO | Echocardiogram |
| EORTC QLQ-C30EORTC QLQ-C30 EORTC QLQ-C30 | European Organisation for Research and Treatment of Cancer Core Quality of Life Question European Organisation for Research and Treatment of Cancer Core Quality of Life Question European Organisation for Research and Treatment of Cancer Core Quality of Life Question |
| FAS | Full analysis set |
| HR | Hazard Ratio |
| HRQoL | Health-related quality of life Health-related quality of lifeHealth-related quality of life Health-related quality of life |
| IE | Ifosfamide and etoposide chemotherapy |
| MedDRA | Medical Dictionary for Regulatory Activities |
| NCI CTCAE | National Cancer Institution Common Terminology Criteria for Adverse Effect |
| NE | Not evaluable |
| OS | Overall survival |
| ORRRRRREER | Objective response rate objective response rate objective response rate objective response rate |
| PD | Progression disease |
| PFS | Progression-free survival |
| PR | Partial response |
| PRO | Patient reported outcome |
| PS | Performance status |
| PT | Preferred term |
| QoL | Quality of life |
| RECIST | Response Evaluation Criteria in Solid Tumors |
| SAE | Serious adverse events |
| SAP | Statistical analysis plan |
| SAS | Statistical Analysis System |
| SD | Stable disease |
| SLDThe sum of longest diameters of the target lesions | The sum of longest diameters of the target lesions |
| SOC | System organ class |
| TEAE | Treatment-emergent adverse event |
| TRAE | Treatment-related TEAE |
| TTP | Time to Progress |
| TTR | Time to Response |
| WHO | World Health Organization |

1. Introduction

This statistical analysis plan (SAP) is developed mainly for the purpose of final analysis. The SAP provides a detailed, technical elaboration of the statistical analyses of efficacy and safety data as described in the study protocol Version 4.1 dated 30-SEP -2022. Specifications for tables, listings, and figures are contained in a separate document.

1. STUDY OBJECTIVES
   1. Primary Objectives

- To assess the efficacy of apatinib plus IE compared with IE in relapsed or refractory osteosarcoma after progression to first-line treatment, as measured by progression-free survival (PFS) according to Response Evaluation Criteria in Solid Tumors (RECIST) version 1.1.
  1. Secondary Objectives
- To assess the overall survival (OS) in subjects treated with apatinib plus IE compared with IE.
- To assess the objective response rate (ORR) in subjects treated with apatinib plus IE compared with IE.
- To assess the disease control rate (DCR) in subjects treated with apatinib plus IE compared with IE.
- To assess the duration of response (DoR) in subjects treated with apatinib plus IE compared with IE.
- To assess the time to response (TTR) in subjects treated with apatinib plus IE compared with IE.
- To assess the time to progression (TTP) in subjects treated with apatinib plus IE compared with IE.
- To assess the 4-month PFS rate and 6-month PFS rate in subjects treated with apatinib plus IE compared with IE.
- To assess the event free survival (EFS) in subjects treated with apatinib plus IE compared with IE.
- To assess the short-term safety (in two years) and long-term safety (in six years) of apatinib plus IE compared with IE, measured by National Cancer Institution Common Terminology Criteria for Adverse Effect (NCI CTCAE) version 5.0.
- To assess the quality of life in subjects treated with apatinib plus IE compared with IE, measured by European Organisation for Research and Treatment of Cancer Core Quality of Life Question (EORTC QLQ-C30).

1. STUDY DESIGN and methods
   1. General Study Design and Plan

This is a multicenter, randomized, open-label, two arm parallel-controlled clinical trial to evaluate the efficacy and safety of apatinib plus IE compared with IE in treating relapsed or refractory osteosarcoma after progression to first-line treatment.

Eligible subjects will be randomized at a ratio of 2:1 to receive apatinib plus IE or IE.

- Subjects assigned to apatinib plus IE group will receive 500mg apatinib orally once a day plus 1.8 mg/m²/d Iifosfamide intravenously on day 1 to day 3 with sufficient hydration and mesna protection plus 100 mg/m²/d etoposide intravenously on day 1 to day 3, every 21 days is a treatment cycle.
- Subjects assigned to IE group will receive 1.8 mg/m²/d Iifosfamide intravenously on day 1 to day 5 plus 100 mg/m²/d etoposide intravenously on day 1 to day 5 with sufficient hydration and mesna protection, every 21 days is a treatment cycle.

Subjects will receive study treatment with each cycle of 21 days until the occurrence of progressive disease (PD), pregnancy, health status deterioration, death, intolerable toxicity, withdrawal of consent, subject requests, investigator’s decision, loss to follow-up or protocol deviations.

All subjects were allowed to receive subsequent local treatment (including surgery or stereotactic surgery, etc.), resection of primary or postoperative locally recurrent tumors and distant metastases, or continued systemic treatment (including continued apatinib treatment and/or chemotherapy combined with IE regimen) after PD or intolerable toxicity.

Efficacy evaluation will be performed at the end of the first and second cycle and every 2 cycles thereafter.

- 1. Randomization

The eligible subjects will be randomly assigned to the either apatinib plus IE or IE alone at a ratio of 2:1 via simple randomization through via simple randomization through a static random table and implemented by IWRS. Patients, investigators and sponsors will not be masked to the treatment assignment.

- 1. Blinding

Not applicable. This is an open-label study.

- 1. Schedule of Events

The schedule of events could be referred to the Section 4.5.3 of the protocol.

1. STUDY ENDPOINTS
   1. Efficacy Endpoint(s)
      1. Primary Efficacy Endpoint(s)

- Investigator assessed PFS based on RECIST v1.1: defined as the time from randomization to disease progression or any cause of death, whichever occurs first.
  - 1. Secondary Efficacy Endpoint(s)
- Overall Survival (OS): defined as the time from randomization to death of any cause.
- Objective Response Rate (ORR): defined as the proportion of subjects whose best overall response (BOR) is CR or PR, evaluated by investigator based on RECIST v1.1.
- Disease Control Rate (DCR): defined as the proportion of subjects whose best overall response (BOR) is complete response (CR), partial response (PR) and stable disease (SD), evaluated by investigator based on RECIST v1.1.
- Duration of response (DoR): defined as the time from first unconfirmed complete response (CR)/ unconfirmed partial response (PR), evaluated by investigator based on RECIST v1.1, to progressive disease (PD) or any cause of death, whichever occurs first.
- Time to Response (TTR): defined as the time from randomization to first CR/PR, evaluated by investigator based on RECIST v1.1.
- Time to Progress (TTP): defined as the time from randomization to progress disease, evaluated by investigator based on RECIST v1.1.
- 4-month PFS rate: refers to the percentage of patients who were alive and free of disease progression at 4 months evaluated by investigator based on RECIST v1.1.
- 6-month PFS rate: refers to the percentage of patients who were alive and free of disease progression at 6 months evaluated by investigator based on RECIST v1.1.
  1. Safety Endpoint(s)

Safety endpoint include Treatment-Emergent Adverse Event (TEAE) and Treatment-Related TEAE (TRAE), clinical laboratory test parameters, vital sign, electrocardiograms, echocardiograms and Eastern Cooperative Oncology Group (ECOG) performance status (PS).

Drug safety:

- AEs: including type, incidence, grading (based on NCI-CTCAE V5.0 criteria), severity, duration, and relevance to the study drug.
- Laboratory abnormal values: type, incidence, grading (based on NCI-CTCAE 5.0 criteria), duration, etc.;
- Vital signs: including blood pressure, pulse, respiratory rate, and ECOG-PS score.

Tolerability: the proportion of dose interruption, dose reduction and discontinuations due to drug-related toxicity during the study.

- 1. Exploratory Endpoint(s)
- Quality of Life (EORTC QLQ-C30)
- Event-free survival (EFS) assessed by investigator based on RECIST v1.1, defined as the time from randomization to the occurrence of disease progression, recurrence, initiation of new anti-tumor therapy, or any cause of death, whichever occurs first.

1. SAMPLE SIZE DETERMINATION

As a multicenter, randomized, open label, two arm parallel-controlled clinical trial. The primary endpoint is PFS in subjects with progressive relapsed or refractory osteosarcoma after first-line chemotherapy treated with apatinib plus IE or IE alone. A total of 78 subjects will be randomized using a 2:1 ratio to receive either apatinib plus IE or IE alone.

According to the recent three-year retrospective data published by the Department of Osteo-Oncology of Peking University People's Hospital and Beijing Shougang Hospital [1].

Assuming a median PFS of 5.0 month in control group (IE alone) and a median PFS of 11.0 month in treatment group (apatinib plus IE), it will require 69 PFS events to provide 80% power to detect a hazard ratio (HR) of 0.45 at two-sided significance level (α)=0.05. Assuming an enrollment period of 18 month, and a follow up of 12 month, with a 2:1 ratio of treatment group and control group, 46 subjects in treatment group and 23 subjects in control group will be required to observe sufficient PFS events at the end of study. By considering a 10% dropout rate, 52 subjects in treatment group and 26 subjects in control group will be needed and the total sample size is of 78 subjects.

1. INTERIM Analysis

NOT APPLICABLE. No interim analyses were planned.

1. GENERAL AND STATISTICAL CONSIDERATIONS
   1. Analysis Sets
      1. Full Analysis Set

Full Analysis Set (FAS) will include all subjects who received at least 1 dose of study treatment. FAS will serve as the main analysis set of efficacy analysis.

- - 1. Safety Analysis Set

The Safety Analysis Set (SS) will include all subjects who received at least 1 dose of the study treatment.

- - 1. Per-Protocol Analysis Set

The Per-protocol Analysis Set (PPS) will include all subjects in the FAS who did not experience significant protocol deviations which may have impact on the results. The criteria which may result in the subjects being excluded from PPS will be finalized before Database-Lock (DBL), and the list of subjects being included or excluded from PPS will be reviewed and finalized by sponsor and the investigator before Database-Lock.

- 1. General Considerations
     1. Reference Start Date, End Date and Study Day

For randomization phase:

- Reference start date is the first date of Randomization.
- Reference end date is the last date of study treatment administration.

Study day will be calculated based on the reference start date:

- Study day = event/assessment date –reference start date + (event/assessment date ≥ reference start date)
  - 1. Baseline

In general, baseline is defined as the last non-missing measurement taken prior to reference start date. In the case where the last non-missing measurement and the reference start date coincide, that measurement will be considered pre-baseline, but Adverse Events (AEs) and medications commencing on the reference start date will be considered post-baseline.

- - 1. Definition and Use of Visit Windows

All the by-visit analysis will use the original visits being recorded in the CRF. No derivation of visit will be performed.

- - 1. Repeated or Unscheduled Assessments of Safety Parameters

In general, all the by-visit summaries will only present the data being recorded in scheduled visits. Measurements recorded in unscheduled visits will not be included in the by-visit summaries, but will contribute to determine the best/worst case value if required (i.e. shift table).

If there are multiple values for the same test before either the initiation of study treatment of randomization phase or extension phased, the last available assessment will be used.

Listings will include all the scheduled and unscheduled data.

- 1. Statistical Considerations
     1. Missing Date or Incomplete Date

In general, the incomplete date will be imputed following the below rules unless otherwise specified if it has impact on the statistical analysis:

- Impute 15 to the day part if only day is missing;
- Impute JUL 01 to the month and day if both month and day is missing;
- Will not impute if completely missing.
  - - 1. Missing or Incomplete Date Information of Study Treatment

In general, the date of study treatment should not be imputed. If date of study treatment is missing or partial missing, all the efforts should be made to obtain the date.

If the last date of study treatment administration is missing due to data cut-off, the date should be imputed to the cut-off date.

- - - 1. Incomplete Date Information for Prior and Concomitant Medications

The date of concomitant medication will only be imputed when partial missing.

- - - - 1. Incomplete Start Dates
- Missing Day and/or Month: impute to the earliest possible date.
- Complete missing date will not be imputed and will be considered as concomitant medication.

In case the imputed start date is after the stop date, then the start date will be imputed using the stop date.

- - - - 1. Incomplete Stop Dates
- Month and day are missing: impute to Dec 31.
- Only day is missing: impute to the last day of the month
- Only month is missing: impute to Dec.

The imputed stop date will then be compared with last date known to be alive or the death date. If the imputed date is later than the reference date, then impute to the date being referenced.

- - - 1. Incomplete Date Information for Adverse Events
         1. Incomplete Start Dates
- Missing Day and Month
  - If the year of the incomplete date is the same as the year of the first date of study treatment administration, then impute to the date of first study treatment administration.
  - If the year of the incomplete date is prior to the year of the first date of study treatment administration, then impute to the Dec 31.
  - If the year of the incomplete date is after the year of the first date of study treatment administration, then impute to Jan 1.
- Missing Day Only
  - If the known parts of the incomplete date is the same as the corresponding parts of the first date of study treatment administration, then impute to the date of first study treatment administration.
  - If the known parts of the incomplete date is prior to the corresponding parts of the first date of study treatment administration, then impute to the last day of the month.
  - If the known part of the incomplete date is after the year of the first date of study treatment administration, then impute to the first day of the month.

In case the imputed start date is after the stop date, then the start date will be imputed using the stop date.

- - - - 1. Incomplete Stop Dates
- If completely missing or the year is missing: impute to the date of last date known to be alive or death date;
- If month and/or day is missing: impute to the latest possible date.
  - - 1. Incomplete death date
- If the only the day is missing: impute to the first day of the month
- If both the month and day are missing: impute with Jan 01
- If completely missing: impute with the next day of last date known to be alive.

The imputed date should be later than the last date known to be alive.

- - - 1. Incomplete PD date

The incomplete PD date will only be imputed in case that year is not missing. The incomplete PD date will be imputed to the earliest possible date. In case of the imputed date is later than death date, death date will be used to impute the PD date.

If PD date is completely missing and no previous PD occurred, the subjects will be considered to be censored.

- - 1. Character Values of Clinical Laboratory Tests

If the reported value for a clinical laboratory test is in form of a character string, then the numeric part of the string will be used for the analysis purpose.

If the result is reported as below-limit-of quantification (BLQ), then the lower boundary of the quantifiable assessment range will be used for the analysis purpose. However, the actual values as reported in the database will be presented in data listings.

- - 1. Computing Methods and Reporting Conventions

All the statistical analysis will be performed with SAS® Version 9.3 or above.

- - - 1. Statistical Summary Conventions

For continuous variables, descriptive statistics including number of subjects with non-missing values, mean, standard deviation, median, minimum, and maximum, will be presented. For categorical variables, frequencies and percentages will be presented. Time-to-events data will be analyzed by Kaplan-Meier method, and K-M plots will be presented if necessary.

- - - 1. General Reporting Conventions

The means and medians should have 1 more decimal place than the observed values, the standard deviations should have 2 additional decimal place than the observed values. Min and Max should have the same decimal place with the observed values.

p-values will be reported to 4 decimal places, the p-values less than 0.0001will be reported as “<0.0001”, while the p-values greater than “0.9999” will be reported as “>0.9999”.

- - 1. Subgroups

Subgroup analysis will be conducted for PFS and OS, which will be described in corresponding sections. It should be noted that the study is not designed to detect the difference in treatment within subgroups. If the subject number of the group is less than 10 or with other considerations, it maybe pooled with others.

The following subgroups will be assessed for OS and PFS:

- Age as categorical variables (<18y, ≥18y)
- ECOG (0, 1, >1)
- Location of primary tumor (Limbs, Others)
- Previous anticancer therapy (Using Ifosfamide, not using Ifosfamide)
- Best overall response to previous ifosfamide treatment (CR+PR, SD, PD)
- Previous surgery (only 1 time, ＞1 time)
- Metastatic sites (≤1 ,2, ≥3)
- Site of lesion (only lung, others)
- Tumor burden (<median, ≥median)
- Number of previous anticancer therapy regimens (1,≥2)

1. STATISTICAL ANALYSIS
   1. Summary of Study Data
      1. Subject Disposition

The number and percentage of subject in each analysis set (Full analysis set, per-protocol analysis set, and safety analysis set will be summarized by treatment group. The number and percentage of subjects discontinued treatment and study during randomization phase will be presented for each treatment group. Reasons for treatment and study discontinuation recorded on the EOS form of CRF will be further summarized as number of subjects and percentage for any treatemnt and apatinib.

- Duration in study (months) = (Last day of known to be alive – randomization date + 1)/30.4375
  - 1. Protocol Deviations

Protocol deviations will be summarized by the treatment group and overall, and furthermore summarized by severity. Major protocol deviation leading to the exclusion of subjects from PPS will also be summarized by treatment group. Protocol deviations will be listed, and the major protocol deviations will be flagged.

- - 1. Demographic and Baseline Characteristics

Demographic and baseline characteristics listed below will be summarized by treatment group and overall for FAS.

- Age as categorical variable (<18-year, >18-year)
- Gender (male, female)
- Baseline ECOG PS (0, 1)
- Baseline Body Mass Index (BMI) (kg/m2), defined as BMI (kg/m2) = weight (kg)/height (m2)2

The continuous data will be summarized by using descriptive statistics, including mean, standard deviation, median, maximum and minimum values. Categorical data will be presented as frequencies and percentages.

- - 1. Tumor Diagnosis and treatment history

The tumor diagnosis and prior treatment history information listed below will be summarized by treatment group and overall for FAS.

- Time since primary diagnosis of osteosarcoma as continuous variable (months)
- Tumor primary location (Limbs, Others)
- Metastatic sites (0, 1, 2, ≥3)
- Relapse status (Yes, No, Unknown)
- Targeted tumor burden as continuous variable(mm)
- Site of lesion (only lung, others)
- Number of previous anticancer therapy regimens (1,2, ≥3)
- Previous anticancer therapy (Anthracyclines, Ifosfamide, Ifosfamide plus etoposide)
- Best overall response to all previous ifosfamide treatment (CR, PR, SD, PD)
- Prior surgery (only 1 time, >1 time)
- Time between previous surgery and initiation of apatinib as continuous variables(months)
- Prior radiotherapy (Yes, No)

The derivation of time since primary diagnosis, targeted tumor burden, Time between previous surgery and initiation of apatinib are listed as below:

- Time since primary diagnosis (month) = (Date of randomization – first time of disease diagnosis + 1)/30.4375
- Targeted tumor burden (mm) = The sum of Longest Diameters of the target lesions (SLD)
- Time between previous surgery and initiation of apatinib (months) = (Date of first apatinib treatment ― Date of previous surgery+1)/30.4375
  1. Efficacy Analyses
     1. Analysis of Primary Efficacy Endpoints

FAS will be used as the primary analysis set for the primary efficacy analysis.

The primary endpoint is investigator evaluated PFS based on RECIST v1.1. PFS is defined as the time from randomization to the date of disease progression or any cause of death, which occurred earlier. Tumor assessments and death occurred after the initiation of new anti-cancer therapy or extension study treatment will not be included in the analysis. The censor rule of PFS is presented as below:

| Case number | Description | Censored/  event | Date of censor/event |
| --- | --- | --- | --- |
| 1 | No baseline or post-baseline tumor assessment | Censored | Randomization date |
| 2 | ≤ 1 missing of tumor assessment before PD or death (PD before the initiation of new anti-cancer therapy and before death, no consecutive missing of tumor assessment ; Death without consecutive missing of tumor assessment, or subsequent anti-cancer therapy or PD) | Event | PD or death date, which occurs earlier |
| 3 | 2 or more consecutive missing of tumor assessment before PD or death | Censored | Last adequate tumor assessment date before consecutive missing of tumor assessment |
| 4 | Initiated new anti-cancer therapy before PD or death | censored | Last adequate tumor assessment date before the initiation of new anti-cancer therapy |
| 5 | No PD or death before study termination, no I-O treatment started | Censored | Last adequate tumor assessment date before consecutive missing of tumor assessment |

Suppose that SA(t) and SP(t) are the cumulative survival functions for PFS in test treatment and control groups, respectively.  The null hypothesis

H0:  SA(t) = SP(t) for all t ≥ 0 (identical survival functions for both treatment groups) will be tested against the 2-sided alternative hypothesis

Ha: SA(t) ≠ SP(t) for at least some t >0

- - - 1. Main analysis of the primary efficacy endpoint

The Kaplan-Meier method will be used to estimate the distribution of PFS (including the median PFS) for each treatment group, the 95% confidence intervals of mPFS will be calculated by using the Brookmeyer and Crowley method. In addition, the PFS rates at 4 and 6 months as well as corresponding 95% confidence intervals will be presented. The corresponding Kaplan-Meier curves will also be presented for each treatment group.

The unstratified log-rank test will be conducted via use of SAS PROC LIFETEST to detect the difference in PFS between the test treatment and control group. The unstratified Cox proportional hazards regression model will be used via SAS PROC PHREG to estimate the hazard ratio and associated 95% confidence interval.

- - - 1. The Kaplan-Meier method will be used to estimate the distribution of PFS (including the median PFS) for each treatment group, the 95% confidence intervals of mPFS will be calculated by using the Brookmeyer and Crowley method. In addition, the unstratified log-rank test will be conducted via use of SAS PROC LIFETEST to detect the difference in PFS between the test treatment and control group. The unstratified Cox proportional hazards regression model will be used via SAS PROC PHREG to estimate the hazard ratio and associated 95% confidence interval. The corresponding Kaplan-Meier curves with log-rank test, Hazard Ratio (HR) and 95% confidence interval between two arms will also be presented.  Sensitivity analysis of the primary efficacy endpoint

The above main analysis method in FAS will be repeated based on PPS for PFS as sensitivity analysis to assess the robustness of the main analysis.

- - - 1. The unstratified log-rank test will be conducted to detect the difference in PFS. The unstratified Cox proportional hazards regression model will be used to estimate the hazard ratio and associated 95% confidence interval. Subgroup analysis

In addition, subgroup analysis will be performed for the baseline factors listed in section 7.3.4. The HR forest plot for apatinib plus IE apatinib versus IE alone group and associated 95% confidence interval will be estimated by unstratified Cox model in each level of the subgroups. An odds ratio (OR) forest plot will be created, and no type I error control will be conducted for subgroup analysis An odds ratio (OR) forest plot will be created, and no type I error control will be conducted for subgroup analysis An odds ratio (OR) forest plot will be created, and no type I error control will be conducted for subgroup analysis An odds ratio (OR) forest plot will be created, and no type I error control will be conducted for subgroup analysis An odds ratio (OR) forest plot will be created, and no type I error control will be conducted for subgroup analysis An odds ratio (OR) forest plot will be created, and no type I error control will be conducted for subgroup analysis An odds ratio (OR) forest plot will be created, and no type I error control will be conducted for subgroup analysis An odds ratio (OR) forest plot will be created, and no type I error control will be conducted for subgroup analysis An odds ratio (OR) forest plot will be created, and no type I error control will be conducted for subgroup analysis An odds ratio (OR) forest plot will be created, and no type I error control will be conducted for subgroup analysis An odds ratio (OR) forest plot will be created, and no type I error control will be conducted for subgroup analysis

- - 1. An odds ratio (OR) forest plot will be created, and no type I error control will be conducted for subgroup analysis Analysis of Secondary Efficacy Endpoints
       1. Overall survival

The analysis of Overall survival (OS) is based on FAS and PPS. OS is defined as from the date of randomization to the date of death. If a subject lost to follow-up or withdrawal from study before death is observed, the subject will be censored at the last date known to be alive.

Similar analysis of PFS will be performed for OS. The Kaplan-Meier method will be used to estimate the distribution of OS (including the median OS) for each treatment group, the 95% confidence intervals of mOS will be calculated by using the Brookmeyer and Crowley method. The corresponding Kaplan-Meier curves with HR and associated 95% confidence interval between two arms with log-rank test, Hazard Ratio and 95% confidence interval between two arms with log-rank test, Hazard Ratio and 95% confidence interval between two arms with log-rank test, Hazard Ratio and 95% confidence interval between two arms with log-rank test, Hazard Ratio and 95% confidence interval between two arms with log-rank test, Hazard Ratio and 95% confidence interval between two arms with log-rank test, Hazard Ratio and 95% confidence interval between two arms with log-rank test, Hazard Ratio and 95% confidence interval between two arms with log-rank test, Hazard Ratio and 95% confidence interval between two arms with log-rank test, Hazard Ratio and 95% confidence interval between two arms with log-rank test, Hazard Ratio and 95% confidence interval between two armswill also be presented.

**Objective response rate (ORR) and Disease control rate (DCR) Objective response rate (ORR) and Disease control rate (DCR) Objective response rate (ORR) and Disease control rate (DCR)** The following sensitivity analysis will be performed to assess the robustness of the main analysis:

- - - 1. Objective response rate (ORR) and Disease control rate (DCR)

Objective response rate (ORR) will be analyzed primarily based on FAS. ORR is defined as the proportion of subjects with best overall response (BOR) of complete response (CR) or partial response (PR) according to RECIST v1.1 in the corresponding analysis set.

Disease control rate (DCR) will be analyzed primarily based on FAS. DCR is defined as the proportion of subjects with best overall response (BOR) of complete response (CR), partial response (PR) or stable disease (SD) according to RECIST v1.1 in the corresponding analysis set.

SD should meet the minimum duration of 6 weeks (42 days) from randomization.

The number and proportion of subjects with BOR of CR, PR, SD, PD and NE in each treatment group will be presented.

The 95% confidence interval of ORR and DCR will be estimated by using Clopper-Pearson method.

Unconfirmed response results will be used for the main analysis, while the confirmed response results are sensitivity analysis. The confirmation rule of BOR could be referred to APPENDIX. Confirmed CR and PR need to be confirmed at least 4 weeks (28 days) apart.

In addition, Waterfall plot presenting best post-baseline tumor shrinkage will also be provided for each treatment group.

- - - 1. Duration of Response (DoR), Time to progress (TTP) and Time to Response (TTR)

Duration of response (DoR) is defined as first time of unconfirmed CR or PR, to PD or death which occurs earlier. The analysis is only applicable for subjects whose best overall response (BOR) is CR or PR. The censor rule is the same as PFS.

Time to response (TTR) is defined as the time from randomization to the first time of CR or PR. The analysis is only applicable for subjects whose BOR is CR or PR.

Time to Progress (TTP) is defined as the time from randomization to progress disease. The censor rule is presented as below.

| Case number | Description | Censored/  event | Date of censor/event |
| --- | --- | --- | --- |
| 1 | No baseline or post-baseline tumor assessment | Censored | Randomization date |
| 2 | ≤ 1 missing of tumor assessment before PD or death (PD before the initiation of new anti-cancer therapy and before death, no consecutive missing of tumor assessment) | Event | PD or death date, which occurs earlier |
| 3 | 2 or more consecutive missing of tumor assessment before PD or death | Censored | Last adequate tumor assessment date before consecutive missing of tumor assessment |
| 4 | No PD or death before study termination, no I-O treatment started | Censored | Last adequate tumor assessment date before consecutive missing of tumor assessment |
| 5 | Death without consecutive missing of tumor assessment, or subsequent anti-cancer therapy or PD | Censored | Death date |

Event-free survival (EFS) is defined as the time from randomization to the occurrence of disease progression, recurrence, initiation of new anti-tumor therapy, or any cause of death, whichever occurs first. The censor rule is presented as below.

| Case number | Description | Censored/  event | Date of censor/event |
| --- | --- | --- | --- |
| 1 | No baseline or post-baseline tumor assessment | Censored | Randomization date |
| 2 | ≤ 1 missing of tumor assessment before PD or death (PD before the initiation of new anti-cancer therapy and before death, no consecutive missing of tumor assessment) | Event | PD or death date, which occurs earlier |
| 3 | Recurrence | Event | Date of recurrence |
| 4 | Initiated new anti-cancer therapy before PD or death | Event | Date of the initiation of new anti-cancer therapy |
| 5 | 2 or more consecutive missing of tumor assessment before PD/death/recurrence/new anti-cancer therapy | Censored | Last adequate tumor assessment date before consecutive missing of tumor assessment |
| 6 | No PD or death or recurrence or new anti-cancer therapy before study termination | Censored | Last adequate tumor assessment date before consecutive missing of tumor assessment |

The analysis methods of DoR, TTP,TTR and EFS is similar to those of PFS and OS.

The Kaplan-Meier method will be used to estimate the distribution of DoR, TTP and TTR (including the median DoR, median TTP and median TTR) for each treatment group, the 95% confidence intervals of mDoR mTTP and mTTR will be calculated by using the Brookmeyer and Crowley method. The corresponding Kaplan-Meier curves will also be presented.

- 1. Safety Analyses

All the safety analysis will be performed for SS except for otherwise specified.

Safety endpoints include treatment-emergent adverse events (TEAE), clinical laboratory tests, vital signs, electrocardiogram (ECG) parameters, echocardiogram (ECHO) parameters and Eastern Cooperative Oncology Group performance status (ECOG PS).

For the safety analysis, the baseline of randomization phase is the last available assessment before the initiation of study treatment in randomization phase.

- - 1. Adverse Events

Adverse events (AE) will be coded using Version 23.1 or above of the Medical Dictionary for Regulatory Activities (MedDRA). AE will be summarized by treatment group for randomization phase.

- An AE will be considered as a TEAE if it occurs or becomes worse in severity after the initiation of study treatment and within 21 days after last study treatment administration.

If the CTCAE grade of an AE is missing, it will be considered as grade 3 AE.

The TEAEs which being recorded as being “related with”, “highly-possibly related with” and “possibly related with” study drug in CRF will be considered as drug related TEAE (TRAE). If the relationship to the study treatment is missing, it will be considered to be related to study treatment.

A high level summary of the number of subjects with TEAEs will be presented by treatment group for randomization phase and extension phase respectively, including the number and percentage of subjects with:

- Any TEAEs
- TEAEs with CTCAE grade ≥ 3
- TEAE leading to dose reduction
- TEAE leading to drug interruption
- TEAE leading to dose reduction or drug interruption
- TEAE leading to study drug permanent discontinuation
- TEAE leading to death
- Serious TEAE (TESAE)
- Study treatment related TEAEs (TRAEs)
- TRAEs with CTCAE grade ≥ 3
- TRAEs leading to dose reduction
- TRAEs leading to drug interruption
- TRAEs leading to dose reduction or drug interruption
- TRAEs leading to death
- Serious TRAEs

The number and percentage of subjects reporting TEAEs in each treatment group during each study phase (randomization phase) will be summarized overall, by system organ class (SOC) and preferred term (PT), and further be summarized by severity (overall and for CTCAE grade ≥ 3). A subject who reports more than 1 TEAEs with the same SOC/PT will only be count once at the corresponding SOC/PT by using the most sever CTCAE grade.

In addition, TEAE with incidence rate ≥10% will also be summarized by PT.

- - - 1. Treatment-related TEAEs

The number and percentage of subjects reporting TRAEs in each treatment group will be summarized overall, by SOC/PT, and further be summarized by severity (overall and for CTCAE grade ≥ 3). Only the occurrence with the highest CTCAE grade and the closest relationship to the study treatment will be counted at the corresponding SOC/PT level if a subject who reports more than 1 TEAEs with different CTCAE grade and relationship to the study treatment which could be coded to the same SOC/PT.

- - - 1. Serious adverse events

SAE will be summarized in the similar way of TEAE. The number and percentage of subjects reporting TEAEs in each treatment group will be summarized overall, by SOC/PT and further be summarized by severity (overall and for CTCAE grade ≥ 3).

Treatment related SAEs will be summarized in the similar way of SAEs.

- - - 1. TEAE leading to study drug interruption, dose reduction and discontinuation

The number and percentage of subjects reporting TEAEs which lead to study drug interruption, dose reduction and drug discontinuation in each treatment group will be summarized overall, by SOC/PT, and further be summarized by severity (overall and for CTCAE grade ≥ 3).

- - - 1. Death, Other Serious Adverse Events, and Other Significant Adverse Events

The numbers and percentages of TEAEs and TRAEs leading to death will be summarized will be summarized by SOC/PT for each treatment group.

- 1. Hazard Ratio (HR) and 95% confidence interval between two arms will also be presentedPatients Reported Outcome (PRO) Analysis

*Describe the analysis method for PRO if applicable.*

Health-related quality of life (HRQoL) will be assessed by the European Organization for Research and Treatment of Cancer Quality of Life Questionnaire-Core 30 (EORTC QLQ-C30). The EORTC QLQ-C30 consists of 30 questions which assess five functional scales (physical, role, cognitive, emotional and social), global health status/quality of life scale, three symptom scales (fatigue, pain, nausea and vomiting) and six single items (dyspnoea, insomnia, appetite loss, constipation, diarrhea and financial difficulties).

The subscales of the EORTC QLQ-C30 will be scored based on the EORTC scoring manual. In summary, each scale will be transformed so that scale scores will range from 0 to 100. The transformation will proceed in two steps.

1. The average of the items contributing subscale will be calculated to compute the raw score (RS) of the scale

RS=(Q1+Q2+…+Qn)/n, in which n is the number of item in the scale.

2. A linear transformation will be applied to ‘standardize’ the raw score

Functional scales: standard score =[1-(RS-1)/R]*100

Symptom scales/ items and general health status/ QoL: standard score =[(RS-1)/R]*100

(where R is the full range of scores for each domain or item)

Scale scores will be summarized as continues variable for baseline and each post-baseline scheduled visit by treatment group. Mean and standard deviation of each visit will be summarized. Friedman tests will be used for comparison among assessments. P value will be reported to examine significant QOL score changes over time.

1. Summary of Changes to the Statistical Analyses Specified in Protocol

- Set EORTC QLQ-C30 as a separate health quality outcome and add the analysis of the quality of life

1. REFERENCES

Insert reference if applicable.

1. APPENDICES

Insert appendix if applicable.
